# Supplementary material for: How Is CYP17A1 Activity Altered in Autism? A Pilot Study to Identify Potential Pharmacological Targets
Source: MDPI journal article supplement (doi:10.3390/life12060867), 2022-06-10
Supplement: s1 [file s1]

**Supplementary Table S1.** Characteristics of the clinical cohort according to DSM-IV with no significant difference for BMI and age between children with autism and healthy controls.

|                   | <b>n</b> | <b>BMI [kg/m<sup>2</sup>]</b> | <b>Age [y]</b> |
|-------------------|----------|-------------------------------|----------------|
| <b>Boys</b>       |          |                               |                |
| Kanner syndrome   | 21       | 20.4 ± 1.3                    | 13.6 ± 0.8     |
| Asperger syndrome | 20       | 18.2 ± 0.7                    | 15.3 ± 0.6     |
| Atypical          | 7        | 18.1 ± 1.0                    | 13.1 ± 1.3     |
| Total diseased    | 48       | 19.1 ± 0.6                    | 14.2 ± 0.5     |
| Healthy           | 48       | 18.6 ± 0.3                    | 14.3 ± 0.5     |
| <b>Girls</b>      |          |                               |                |
| Kanner syndrome   | 8        | 16.9 ± 1.0                    | 14.4 ± 1.5     |
| Asperger syndrome | 7        | 18.2 ± 1.2                    | 13.0 ± 1.9     |
| Atypical          | 1        | 17.9                          | 15.0           |
| Total diseased    | 16       | 17.5 ± 0.7                    | 13.8 ± 1.0     |
| Healthy           | 16       | 17.2 ± 0.8                    | 13.2 ± 0.8     |
